# Supplementary material for: Specific and efficient knockdown of intracellular miRNA using partially neutralized phosphate-methylated DNA oligonucleic acid-loaded mesoporous silica nanoparticles
Source: Royal Society of Chemistry journal article supplement (doi:10.1039/d4tb00509k), 2024-01-01
Supplement: d4tb00509k1.pdf [file d4tb00509k1.pdf]

**Supplementary Information**

**Specific and efficient knockdown of intracellular  
miRNA and mRNA using partially neutralized  
phosphate-methylated DNA oligonucleic acid-loaded  
mesoporous silica nanoparticles**

Yi-Jung Sung<sup>a</sup>, Wei-Ting Cai<sup>a</sup>, Yi-Ping Chen<sup>b</sup>, Hardy Wai-Hong Chan<sup>c</sup>, Cong-Kai Lin<sup>d</sup>, Po-Hsiang Wang<sup>a,e,\*</sup>, and Wen-Yih Chen<sup>a,\*</sup>

<sup>a</sup> Department of Chemical and Materials Engineering, National Central University, Taoyuan 320, Taiwan.

<sup>b</sup> Graduate Institute of Nanomedicine and Medical Engineering, Taipei Medical University, Taipei 110, Taiwan

<sup>c</sup> Helios Bioelectronics Inc., Hsinchu 302, Taiwan

<sup>d</sup> Graduate Institute of Biomedical Materials and Tissue Engineering, College of Biomedical Engineering, Taipei Medical University, Taipei 110, Taiwan

<sup>e</sup> Graduate Institute of Environmental Engineering, National Central University, Taoyuan 320, Taiwan.

## Supplementary Data

### Data 1 Calculation of N/P ratio

The materials of MSN are tetraethoxysilane (TEOS) and hexadecyl trimethyl ammonium bromide (CTAB). MSN was modified with polyethylene glycol (PEG) and polyethyleneimine (PEI).

The density of TEOS is 0.933 g/mL. The purity of TEOS is 98%. 1.25 mL TEOS was dissolved in 5 mL ethanol, and TEOS accounts for 0.2 (1.25 / 6.25). 2 mL of TEOS mixture was used in MSN synthesis.

The mass of TEOS:

$$0.2 \times 2 \text{ mL} \times 0.933 \text{ g/mL} \times 0.98 = 365.73 \text{ mg}$$

The density of PEG material was 1.076 g/L. 550  $\mu$ L PEG was used in MSN synthesis.

The mass of PEG:

$$550 \text{ } \mu\text{L} \times 1076 \text{ g/L} = 591800 \text{ } \mu\text{g} = 591.8 \text{ mg}$$

The density of PEI material was 0.92 g/mL. PEI was diluted to 50% (v/v). 20  $\mu$ L of mixture was used in MSN synthesis.

The mass of PEI:

$$20 \text{ } \mu\text{L} \times 0.92 \text{ g/mL} \times 0.5 = 9.2 \text{ mg}$$

290 mg CTAB was used in MSN synthesis.

The mass ratio of PEI to MSN:

$$9.2 \text{ mg} / (9.2 \text{ mg} + 591.8 \text{ mg} + 290 \text{ mg} + 365.73 \text{ mg}) = 0.732\%$$

The molecular weight of one PEI unit is 292 g/mol, and the average molecular weight of the entire PEI chain is 1650 g/mol. Consequently, the entire PEI chain is composed of 5.651 repeating units, with each unit containing three nitrogen atoms. Therefore, the entire PEI chain consists of 16.952 nitrogen atoms.

N/P ratio is the ratio of positively-chargeable polymer amine (N) groups to negatively-charged nucleic acid phosphate (P) groups.

The mass ratio of the MSN to the ASO probe used in ASO loading is 128:1 (w/w). PEI accounts for 0.732% of MSN (w/w). The average molecular weight of the entire PEI chain is 1650 g/mol containing 16.952 nitrogen atoms.

N:

$$(128 \times 0.00732) / (1650 \times 16.952)$$

The molecular weight of the ASO probe is 6702 g/mol containing 22 nucleotides.

P:

$$1 / 6702 \times 22$$

N/P ratio:

$$\frac{(128 \times 0.00732)}{(1650 \times 16.952)} = 4.94$$
$$\frac{1}{(6702 \times 22)}$$

**Data 2 Calculation of RNA expression *via* the comparative Ct method**

Ct values were determined by RT-qPCR. U6 was used as a housekeeping gene for miRNA studies. A control group represents a nontreatment group and an N4-mid nDNA group represents a group that cells treated with N4-mid nDNA-loaded MSN.

The Ct values of a control group are 17.4 for miR-21 and 13.6125 for U6.

The  $\Delta$ Ct value of a control group:

$$17.4 - 13.6125 = 3.7875$$

The Ct values of an N4-mid nDNA group are 18.98 for miR-21 and 12.21 for U6.

The  $\Delta$ Ct value of an N4-mid nDNA group:

$$18.98 - 12.21 = 5.77$$

The  $\Delta\Delta$ Ct value:

$$5.77 - 3.7875 = 1.9825$$

The comparative Ct method for quantitative gene expression:

$$2^{(-\Delta\Delta Ct)}$$

Expression of miR-21 in HCT116:

$$2^{(-\Delta\Delta Ct)} = 0.25 = 25\%$$

## Supplementary Tables

**Table S1 Oligonucleotide probe sequence of all probes used in this study.**

| <b>Probes</b>      | <b>Sequence (5' - 3')</b>            |
|--------------------|--------------------------------------|
| miR-21 Scramble    | CAT TAA TGT CGG ACA ACT CAAT         |
| miR-21 DNA         | TCA ACA TCA GTC TGA TAA GCTA         |
| miR-21 N4-mid nDNA | TCA ACA <b>TCA GTC TGA TAA GCTA</b>  |
| miR-21 N4-5' nDNA  | <b>TCA ACA TCA GTC TGA TAA GCTA</b>  |
| miR-21 N4-3' nDNA  | TCA ACA TCA GTC TGA <b>TAA GCTAG</b> |

\*Bases with MPTE modifications are shown in boldface

Supplementary Figures

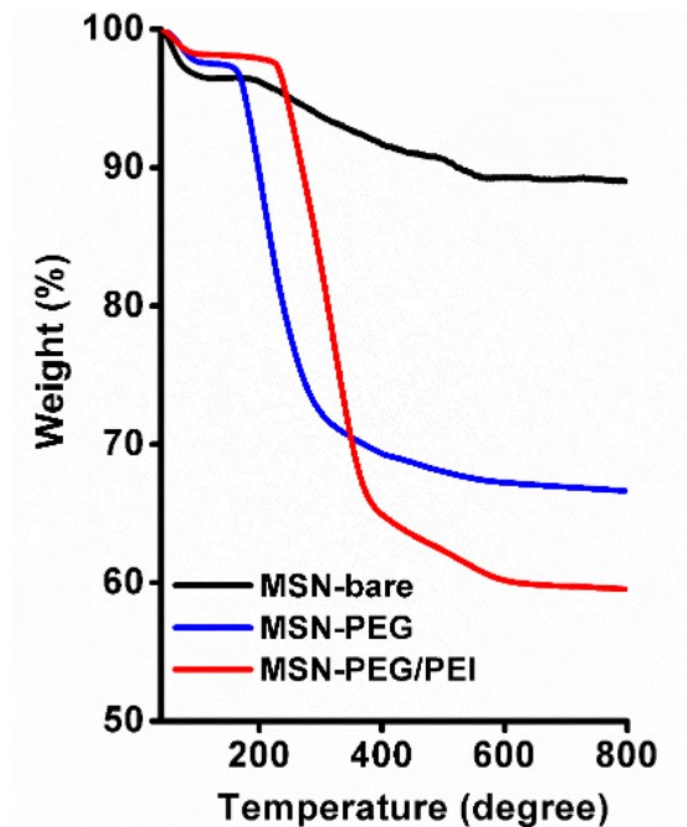

| Weight Loss (%) <sup>a-c</sup> | Bare  | PEG   | PEG/PEI | PEG    | PEI   |
|--------------------------------|-------|-------|---------|--------|-------|
| 25 nm MSN                      | 7.46% | 30.7% | 38.58%  | 23.24% | 0.42% |

- a. Weigh lost calculated from 150-800 degrees
- b. Weight lost of PEG (blue) was subtract weight lost of MSN-bare
- c. Weight lost of PEI (red) was subtract weight lost of MSN-bare and MSN-PEG

Figure S1 Thermogravimetric analysis (TGA). TGA was conducted to evaluate MSN before and after surface modification with PEI and PEG.

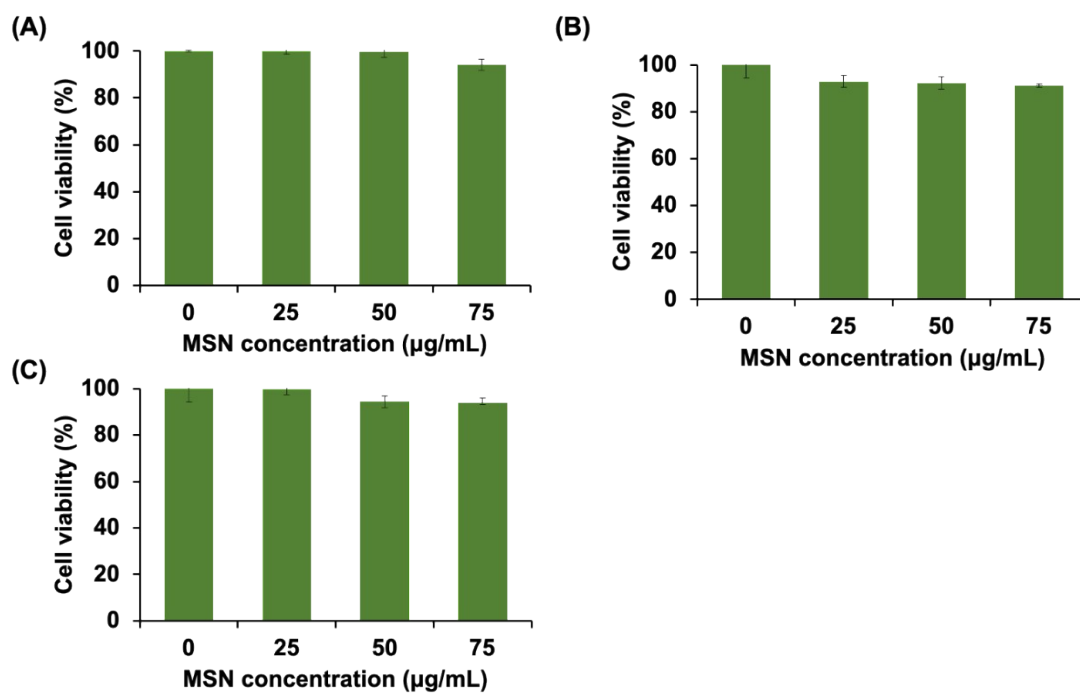

**Figure S2 Cell viability of MSN-treated HCT116 cells.** HCT116 were treated with MSN for (A) 24 h, (B) 48 h, and (C) 72 h incubation and cell viability was determined by cell viability assay. The MSN concentration used in *in vitro* assessment is 64 µg/mL for 75 nM ASO probe concentration. All results are expressed as the mean ± S.D. (n = 4)

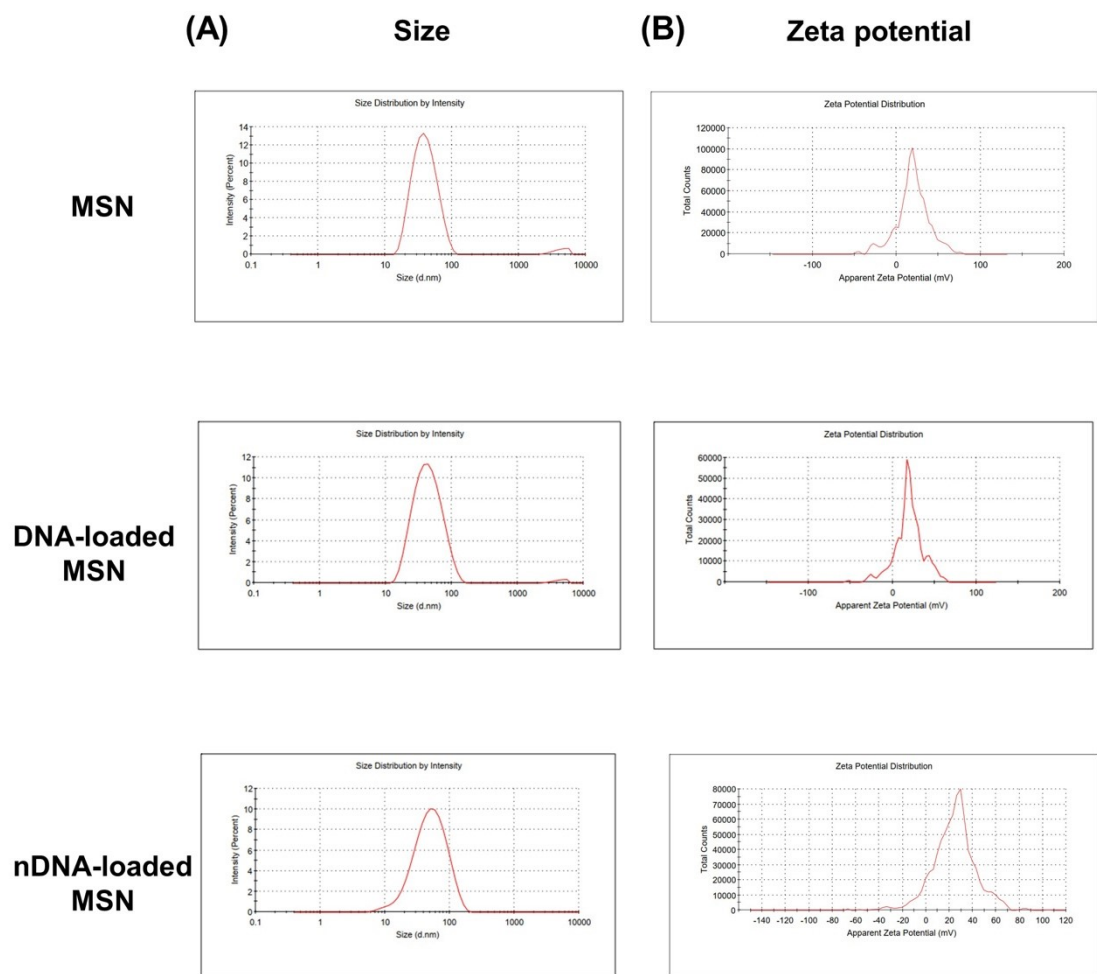

**Figure S3 Distribution of hydrodynamic diameter and  $\zeta$ -potential of MSNs in water. (A) Size distribution by intensity and (B)  $\zeta$  potential distribution.**



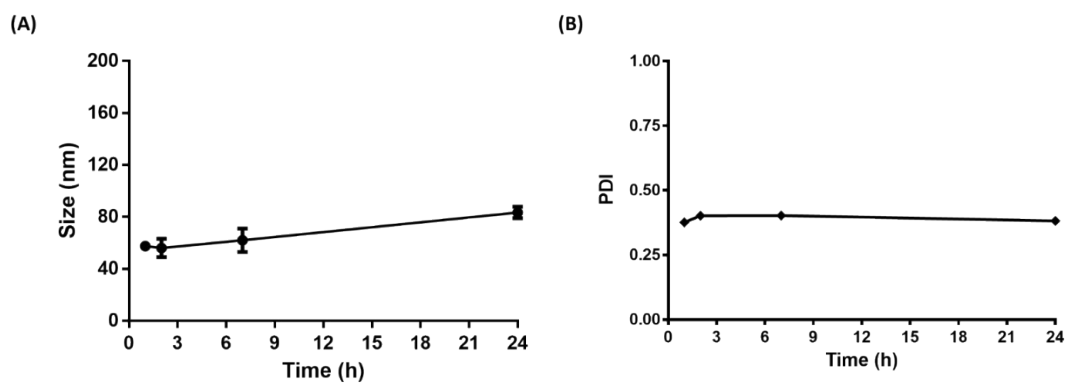

**Figure S4 Serum stability of probe-loaded MSN.** Serum stability of probe-loaded MSN measured by (A) particle size and (B) PDI over 24 hours in McCoy' 5A medium containing 10% serum. The results are expressed as the mean  $\pm$  S.D. (n = 3)

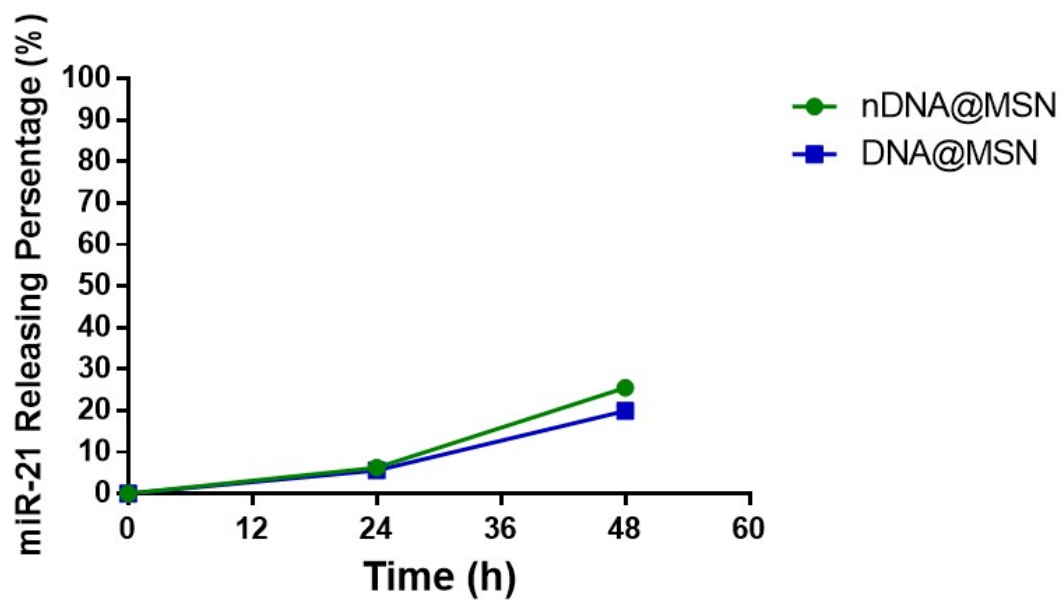

**Figure S5 Release test of nDNA- and DNA-loaded MSN.** Release profiles of nDNA and DNA from nDNA- and DNA-loaded MSN during 48 h. The results are expressed as the mean  $\pm$  S.D. (n = 3)

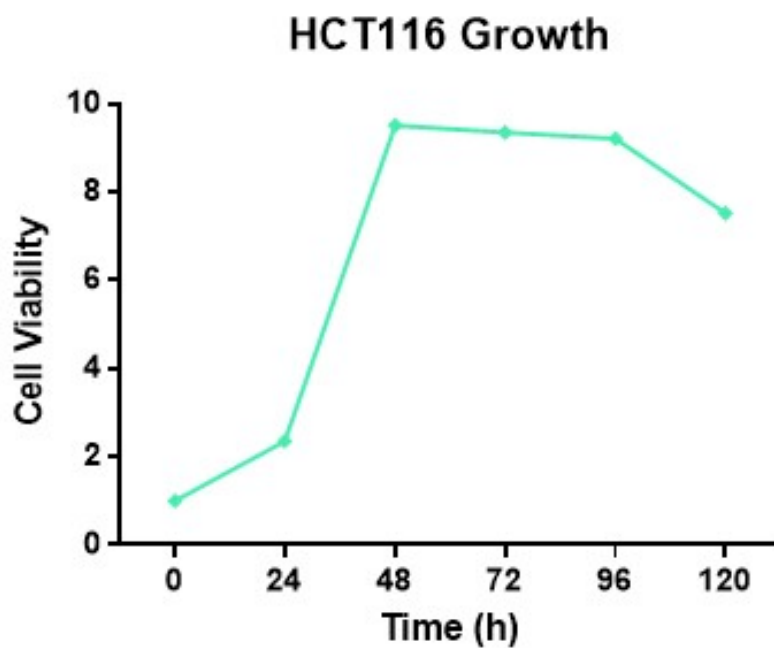

**Figure S6 Cell growth assessment of HCT116 by cell viability assay.** The cell viability decreased, and alterations in cell morphology were observed after 72 hours of incubation. All results are expressed as the mean  $\pm$  S.D. (n = 4)

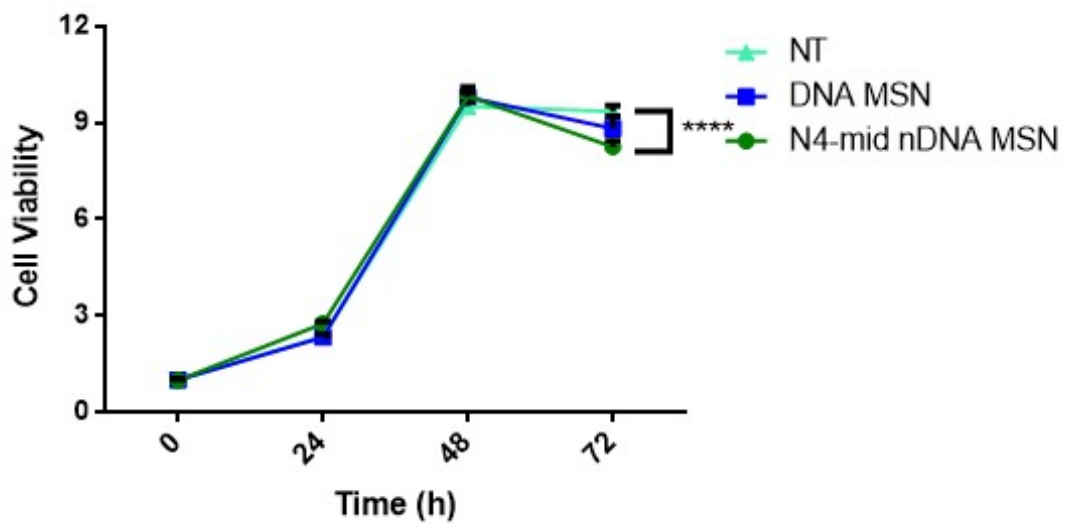

**Figure S7 Cell growth suppression by N4-mid nDNA- and DNA-loaded MSN during a 72-hour incubation.** Cells were treated at a probe concentration of 75 nM, and cell growth was observed by a cell viability assay. All results are expressed as the mean  $\pm$  S.D. (n = 4), \*\*\*\*  $p < 0.0001$  (two-way ANOVA with Tukey's multiple comparisons test)
